# Supplementary material for: Surgical management of patent ductus arteriosus in pre-term infants - a british paediatric surveillance study
Source: Springer Nature journal article supplement (doi:10.1186/s12887-021-02734-9), 2021-06-09
Supplement: MOESM1 [file 19244044]

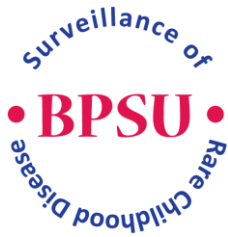

## Case notification form - Strictly Confidential

### Surgically Ligated Patent Ductus Arteriosus in Premature Babies

*The first page of the case notification form will be stored separately from the rest of the questionnaire and personal identifying information for the case will be used only for linkage of records.*

#### SECTION 1: REPORTER DETAILS

1.1 Date of completion of questionnaire: : \_\_ / \_\_ / \_\_\_\_

1.2 Consultant responsible for case at your hospital .....

1.3 Name of your hospital .....

1.4 Telephone number:

1.5 Email address:

1.6 Has the patient been referred to/from another centre?

Yes  No  Unknown

If yes:

a) Please name centre .....

b) Please name consultant .....

1.7 Name of hospital at which PDA closure undertaken .....

1.8 Location of PDA closure

NICU  Cardiothoracic Theatre  Other  Please specify .....

#### SECTION 2: CHILD'S DETAILS

2.1 Date of birth: \_\_ / \_\_ / \_\_\_\_

2.2 NHS / CHI number: .....



|                                                            |                              |                             |
|------------------------------------------------------------|------------------------------|-----------------------------|
| Cardiovascular instability                                 | Yes <input type="checkbox"/> | No <input type="checkbox"/> |
| Poor growth                                                | Yes <input type="checkbox"/> | No <input type="checkbox"/> |
| Contraindication of medical therapy                        | Yes <input type="checkbox"/> | No <input type="checkbox"/> |
| Haemodynamic significance on echocardiography              | Yes <input type="checkbox"/> | No <input type="checkbox"/> |
| Other <input type="checkbox"/> <i>please specify</i> ..... |                              |                             |

**SECTION 4: PATENT DUCTUS ARTERIOSUS SPECIFIC TREATMENT BEFORE PDA LIGATION:**

**4.1** Was a NSAID eg ibuprofen/indomethacin used pre-ligation?      Yes       No

*If No, please go to section 4.5.*

*If Yes, please continue.*

If yes, please indicate which was used:

|              |                                                          |                                  |
|--------------|----------------------------------------------------------|----------------------------------|
| Indomethacin | Yes <input type="checkbox"/> No <input type="checkbox"/> | Unknown <input type="checkbox"/> |
| Ibuprofen    | Yes <input type="checkbox"/> No <input type="checkbox"/> | Unknown <input type="checkbox"/> |

**4.2** Was the treatment

|              |                                                          |                  |
|--------------|----------------------------------------------------------|------------------|
| Prophylactic | Yes <input type="checkbox"/> No <input type="checkbox"/> | If yes go to 4.3 |
| Targeted     | Yes <input type="checkbox"/> No <input type="checkbox"/> | If yes go to 4.4 |

**4.3** For Prophylactic treatment

What dose was given?      .....mg/kg/day for .....days

Was the course completed?      Yes       No

**4.4** For targeted treatment

What dose was given?      .....mg/kg/day for .....days

Then .....mg/kg/day (if appropriate) for .....days

How many courses were given?      .....courses

Were the courses completed? Yes  No  Unknown

If not completed, please state why.....

4.5 If indometacin or ibuprofen were not used, was the reason documented?

Yes  No

4.6 If documented was the reason:

Renal impairment Yes  No  Unknown

Thrombocytopaenia Yes  No  Unknown

Sepsis Yes  No  Unknown

Other Yes

Please specify other .....

## SECTION 5: MORBIDITY BEFORE PDA LIGATION

Before ligation, did the baby have: (please tick all that apply)

Radiologically confirmed necrotising enterocolitis Yes  No

Necrotising enterocolitis requiring surgery Yes  No

Intraventricular haemorrhage Yes  No

Pulmonary haemorrhage Yes  No

Intraventricular haemorrhage with infarction Yes  No

Retinopathy of prematurity Yes  No

## SECTION 6: CLINICAL PICTURE ON DAY BEFORE LIGATION:

6.1 Respiratory support (*tick which option is appropriate*)

Intubated and ventilated  FiO2 .....%

*If intubated and ventilated, was this only for transfer for PDA ligation?*

Yes  No

*If yes, please also tick the mode of respiratory support prior to intubation for transfer*

CPAP

FiO2 .....%

Nasal cannula oxygen

FiO2.....l/min  or %

None

### 6.2 Cardiovascular support

Inotropes Yes  No  Not known

Fluid restricted Yes  No  Not known

### 6.3 Nutrition

Full enteral feeds Yes  No  Not known

Less than full enteral feeds Yes  No  Not known

Parental Nutrition Yes  No  Not known  Not Applicable

## SECTION 7: LIGATION PROCEDURE:

### 7.1 Please tick which procedure was used to close the PDA

Open Ligation

Catheter occlusion

**Please answer the whole questionnaire for all PDA closures – whether ligation or catheter occlusion**

7.2 Date of referral for PDA ligation \_\_ / \_\_ / \_\_\_\_

7.3 Number of institutions contacted to perform ligation.....

7.4 Date of PDA ligation \_\_ / \_\_ / \_\_\_\_\_

7.5 At the time of ligation what was the baby's:

Age .....days

Weight .....grams

7.6 Was the ligation performed as a day case? Yes  No

7.7 Date of extubation **post surgery** \_\_ / \_\_ / \_\_\_\_\_ or still ventilated

### SECTION 8: POST OPERATIVE SURGICAL COMPLICATIONS

Were there any complications related to surgery? Yes  No

If yes please tick all that apply

Chylothorax

Pneumothorax

Wound infection

Death

Other  please specify .....

### SECTION 9: CO-MORBIDITY POST PDA LIGATION
