# Supplementary material for: Surgical management of patent ductus arteriosus in pre-term infants - a british paediatric surveillance study
Source: Springer Nature journal article supplement (doi:10.1186/s12887-021-02734-9), 2021-06-09
Supplement: MOESM3 [file 19244044]

|                               | n   | Reporting any complication (n, %) | Unadjusted odds ratio for complication (95% CI) | p-value |
|-------------------------------|-----|-----------------------------------|-------------------------------------------------|---------|
| <b>Gender</b>                 |     |                                   |                                                 |         |
| Male                          | 158 | 35 (22.2)                         | 1.0                                             | 0.426   |
| Female                        | 105 | 19 (18.1)                         | 0.78 (0.42-1.45)                                |         |
| <b>Gestation at Birth</b>     |     |                                   |                                                 |         |
| Extremely preterm             | 231 | 47 (20.4)                         | 1.0                                             | 0.869   |
| Very preterm                  | 25  | 5 (20.0)                          | 0.98 (0.35-2.74)                                |         |
| Moderately preterm            | 7   | 2 (28.6)                          | 1.57 (0.29-8.33)                                |         |
| <b>Birth Weight</b>           |     |                                   |                                                 |         |
| Extremely low ( $\leq 999$ g) | 219 | 46 (21.0)                         | 1.0                                             | 0.678   |
| Very low (1000 – 1499g)       | 29  | 5 (17.2)                          | 0.78 (0.28-2.17)                                |         |
| Low (1500-2499g)              | 6   | 2 (33.3)                          | 1.88 (0.33-10.6)                                |         |
| Normal ( $\geq 2500$ g)       | 1   | 1 (100)                           | Omitted                                         |         |
| Unknown                       | 8   | 0 (0)                             | Omitted                                         |         |
| <b>Gestation at procedure</b> |     |                                   |                                                 |         |
| Extremely preterm             | 35  | 10 (28.6)                         | 1.0                                             | 0.447   |
| Very preterm                  | 133 | 30 (22.6)                         | 0.73 (0.31-1.68)                                |         |
| Moderately preterm            | 49  | 7 (14.3)                          | 0.42 (0.14-1.23)                                |         |
| Term +                        | 37  | 6 (16.2)                          | 0.48 (0.15-1.51)                                |         |
| Unknown                       | 9   | 1 (11.1)                          | 0.31 (0.03-2.83)                                |         |
| <b>Weight at procedure</b>    |     |                                   |                                                 |         |
| $\leq 999$ g                  | 113 | 28 (24.8)                         | 1.0                                             | 0.480   |
| 1000 – 1499g                  | 77  | 11 (14.3)                         | 0.51 (0.23-1.09)                                |         |
| 1500-2499g                    | 41  | 8 (19.5)                          | 0.74 (0.30-1.78)                                |         |
| $\geq 2500$ g                 | 17  | 3 (17.7)                          | 0.65 (0.17-2.43)                                |         |
| Unknown                       | 15  | 4 (26.7)                          | 1.10 (0.33-3.74)                                |         |
| <b>Ethnicity</b>              |     |                                   |                                                 |         |
| White                         | 166 | 36 (21.7)                         | 1.0                                             | 0.210   |
| Mixed                         | 11  | 4 (36.4)                          | 2.06 (0.57-7.44)                                |         |
| Asian or Asian British        | 23  | 2 (8.7)                           | 0.34 (0.08-1.54)                                |         |
| Black or British Black        | 28  | 5 (17.9)                          | 0.79 (0.28-2.21)                                |         |
| Chinese or Other              | 6   | 3 (50.0)                          | 3.61 (0.70-18.7)                                |         |
| Unknown                       | 29  | 4 (13.8)                          | 0.58 (0.19-0.40)                                |         |
| <b>Type of procedure</b>      |     |                                   |                                                 |         |
| Open ligation                 | 236 | 46 (19.5)                         | 1.0                                             | 0.318   |
| Catheter occlusion            | 9   | 3 (33.3)                          | 2.07 (0.50-8.57)                                |         |

**Supplementary Material 3 - Odds ratio for having any complication by gestational age, gestation and weight at surgery, ethnicity and type of procedure.**
