# Supplementary material for: Surgical management of patent ductus arteriosus in pre-term infants - a british paediatric surveillance study
Source: Springer Nature journal article supplement (doi:10.1186/s12887-021-02734-9), 2021-06-09
Supplement: MOESM4 [file 19244044]

|                               | n   | Deaths (n, %) | Unadjusted odds ratio for death (95% CI) | p-value |
|-------------------------------|-----|---------------|------------------------------------------|---------|
| <b>Gender</b>                 |     |               |                                          |         |
| Male                          | 158 | 10 (6.3)      | 1.0                                      | 0.913   |
| Female                        | 105 | 7 (6.7)       | 1.06 (0.39-2.87)                         |         |
| <b>Gestation at Birth</b>     |     |               |                                          |         |
| Extremely preterm             | 231 | 15 (6.5)      | 1.0                                      | 0.774   |
| Very preterm                  | 25  | 2 (8.0)       | 1.25 (0.27-5.82)                         |         |
| Moderately preterm            | 7   | 0 (0)         | Omitted                                  |         |
| <b>Birth Weight</b>           |     |               |                                          |         |
| Extremely low ( $\leq 999$ g) | 219 | 14 (6.4)      | 1.0                                      | 0.433   |
| Very low (1000 – 1499g)       | 29  | 3 (10.3)      | 1.69 (0.45-6.27)                         |         |
| Low (1500-2499g)              | 6   | 0 (0)         | Omitted                                  |         |
| Normal ( $\geq 2500$ g)       | 1   | 0 (0)         | Omitted                                  |         |
| Unknown                       | 8   | 0 (0)         | Omitted                                  |         |
| <b>Gestation at procedure</b> |     |               |                                          |         |
| Extremely preterm             | 35  | 2 (5.7)       | 1.0                                      | 0.851   |
| Very preterm                  | 133 | 10 (7.5)      | 1.34 (0.28-6.42)                         |         |
| Moderately preterm            | 49  | 0 (0)         | Omitted                                  |         |
| Term +                        | 37  | 4 (10.8)      | 2.0 (0.34-11.7)                          |         |
| Unknown                       | 9   | 1 (11.1)      | 2.1 (0.17-25.7)                          |         |
| <b>Weight at procedure</b>    |     |               |                                          |         |
| $\leq 999$ g                  | 113 | 8 (7.1)       | 1.0                                      | 0.736   |
| 1000 – 1499g                  | 77  | 4 (5.2)       | 0.72 (0.21-2.48)                         |         |
| 1500-2499g                    | 41  | 3 (7.3)       | 1.04 (0.26-4.11)                         |         |
| $\geq 2500$ g                 | 17  | 0 (0)         | Omitted                                  |         |
| Unknown                       | 15  | 2 (13.3)      | 2.02 (0.39-10.5)                         |         |
| <b>Ethnicity</b>              |     |               |                                          |         |
| White                         | 166 | 9 (5.4)       | 1.0                                      | 0.665   |
| Mixed                         | 11  | 1 (9.1)       | 1.74 (0.20-15.17)                        |         |
| Asian or Asian British        | 23  | 3 (13.0)      | 2.62 (0.65-10.47)                        |         |
| Black or British Black        | 28  | 1 (3.6)       | 0.65 (0.08-5.31)                         |         |
| Chinese or Other              | 6   | 1 (16.7)      | 3.49 (0.37-33.09)                        |         |
| Unknown                       | 29  | 2 (6.9)       | 1.29 (0.26-6.31)                         |         |
| <b>Type of procedure</b>      |     |               |                                          |         |
| Open ligation                 | 236 | 16 (6.8)      | 1.0                                      | N/A     |
| Catheter occlusion            | 9   | 0 (0)         | Omitted                                  |         |

**Supplementary Material 4 - Odds ratio for mortality by gestational age, gestation and weight at surgery, ethnicity and type of procedure.**
