# Supplementary material for: Surgical management of patent ductus arteriosus in pre-term infants - a british paediatric surveillance study
Source: Springer Nature journal article supplement (doi:10.1186/s12887-021-02734-9), 2021-06-09
Supplement: MOESM5 [file 19244044]

| Year    | Catheter closure     |                     |       | Surgical closure     |                     |       | Grand Total |
|---------|----------------------|---------------------|-------|----------------------|---------------------|-------|-------------|
|         | Neonate <sup>1</sup> | Infant <sup>2</sup> | Total | Neonate <sup>1</sup> | Infant <sup>2</sup> | Total |             |
| 2015-16 | 1                    | 107                 | 108   | 74                   | 183                 | 257   | 365         |
| 2014-15 | 1                    | 129                 | 130   | 94                   | 180                 | 274   | 404         |
| 2013-14 | 1                    | 120                 | 121   | 130                  | 206                 | 336   | 457         |
| 2012-13 | 1                    | 159                 | 160   | 137                  | 230                 | 367   | 527         |
| 2011-12 | 1                    | 134                 | 135   | 147                  | 240                 | 387   | 522         |
| 2010-11 | 1                    | 111                 | 112   | 177                  | 273                 | 450   | 562         |

<sup>1</sup> Neonates 1-30 days of age, <sup>2</sup> Infant 31-365 days of age

**Supplementary Material 5 - PDA closure rates NICOR data 2010 - 2016**
